# Supplementary material for: A Real-Time Monitoring System to Assess the Platelet Aggregatory Capacity of Components of a Tissue-Engineered Blood Vessel Wall
Source: PubMed Central journal article supplement (PMC4943470; doi:10.1089/ten.tec.2015.0582), 2016-06-24
Supplement: Supp_Fig1.pdf [file Supp_Fig1.pdf]

## Supplementary Data

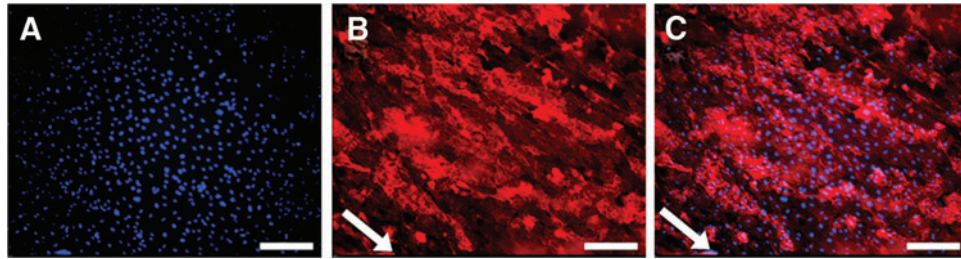

**SUPPLEMENTARY FIG. S1.** Fluorescent image of CD31 expression of HUVECs grown and culture in TEIL with PLA nanofibers as the basement membrane. (A) DAPI (nucleus, *blue*), (B) CD31 (HUVEC marker, *red*), (C) overlay image of A and B. The *arrows* indicate the alignment direction in nanofiber. Scale bar = 200  $\mu\text{m}$ . HUVEC, human umbilical vein endothelial cell; TEIL, tissue-engineered intimal layer.
