# Supplementary material for: A Real-Time Monitoring System to Assess the Platelet Aggregatory Capacity of Components of a Tissue-Engineered Blood Vessel Wall
Source: PubMed Central journal article supplement (PMC4943470; doi:10.1089/ten.tec.2015.0582), 2016-06-24
Supplement: Supp_Fig2.pdf [file Supp_Fig2.pdf]

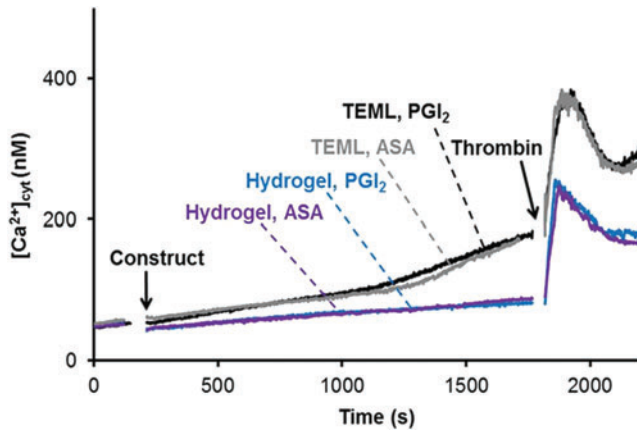

**SUPPLEMENTARY FIG. S2.** Real-time measurements of cytosolic calcium concentration  $[Ca^{2+}]_{cyt}$  in the wash platelet suspension prepared by aspirin (ASA) or prostacyclin (PGI<sub>2</sub>) exposing to acellular collagen hydrogel and TEML vessel constructs for 15 min at 37°C. The constructs were removed and the  $[Ca^{2+}]_{cyt}$  in the remaining suspension was recorded and stimulated with 0.2 U/mL thrombin. Results are representative of four experiments. TEML, tissue-engineered medial layer.
